# Supplementary material
Source: publisher figshare collection journal article supplement (https://rs.figshare.com/ndownloader/files/13268585)
Supplement: Supplementary file 1 [file 13268585]

## Sheet: data
rank	experiment	strain	mouse.status	tick.status	Sample.Name	mouse.id	tick.id	log10.spiro_FLAG	log10.spiro_A3	log10.spiro_A10	log10.meth1_foc	log10.meth2_foc	log10.meth3_foc	call_FLAG	Call_A10	Call_A3	call_foc
1	1	A3	single	single	S01_104	S01	104	4.92	4.94	NA	4.94	4.92	4.92215	Positive	Negative	Positive	Positive
2	1	A3	single	single	S01_117	S01	117	4.32	4.6	NA	4.6	4.32	4.3214	Positive	Negative	Positive	Positive
3	1	A3	single	single	S01_118	S01	118	4.49	4.53	NA	4.53	4.49	4.48563	Positive	Negative	Positive	Positive
4	1	A3	single	single	S01_64	S01	64	3.81	4.25	NA	4.25	3.81	3.80532	Positive	Negative	Positive	Positive
5	1	A3	single	single	S01_83	S01	83	4.45	4.59	NA	4.59	4.45	4.44537	Positive	Negative	Positive	Positive
6	1	A3	single	single	S01_89	S01	89	4.17	4.74	NA	4.74	4.17	4.17167	Positive	Negative	Positive	Positive
7	1	A3	single	single	S01_95	S01	95	4.4	4.65	NA	4.65	4.4	4.40286	Positive	Negative	Positive	Positive
8	1	A3	single	single	S01_96	S01	96	3.56	3.84	NA	3.84	3.56	3.55616	Positive	Negative	Positive	Positive
9	1	A3	single	single	S02_51	S02	51	4.34	4.67	NA	4.67	4.34	4.33666	Positive	Negative	Positive	Positive
10	1	A3	single	single	S02_52	S02	52	4.72	4.96	NA	4.96	4.72	4.72283	Positive	Negative	Positive	Positive
11	1	A3	single	single	S02_53	S02	53	2.76	3.11	NA	3.11	2.76	2.76018	Positive	Negative	Positive	Positive
12	1	A3	single	single	S02_54	S02	54	4.15	4.48	NA	4.48	4.15	4.15474	Positive	Negative	Positive	Positive
13	1	A3	single	single	S02_56	S02	56	1.53	2.64	NA	2.64	1.53	1.53339	Positive	Negative	Positive	Positive
14	1	A3	single	single	S02_57	S02	57	4.59	4.6	NA	4.6	4.59	4.59419	Positive	Negative	Positive	Positive
15	1	A3	single	single	S02_60	S02	60	4	4.14	NA	4.14	4	4.00147	Positive	Negative	Positive	Positive
16	1	A3	single	single	S02_62	S02	62	4.49	4.6	NA	4.6	4.49	4.489	Positive	Negative	Positive	Positive
17	1	A3	single	single	S02_63	S02	63	2.62	3	NA	3	2.62	2.61773	Positive	Negative	Positive	Positive
18	1	A3	single	single	S03_103	S03	103	3.99	4.12	NA	4.12	3.99	3.99006	Positive	Negative	Positive	Positive
19	1	A3	single	single	S03_108	S03	108	1.93	2.97	NA	2.97	1.93	1.92988	Positive	Negative	Positive	Positive
20	1	A3	single	single	S03_109	S03	109	5.34	5.48	NA	5.48	5.34	5.34011	Positive	Negative	Positive	Positive
21	1	A3	single	single	S03_52	S03	52	4.15	4.64	NA	4.64	4.15	4.14904	Positive	Negative	Positive	Positive
22	1	A3	single	single	S03_69	S03	69	3.75	4	NA	4	3.75	3.74859	Positive	Negative	Positive	Positive
23	1	A3	single	single	S03_73	S03	73	3.75	3.91	NA	3.91	3.75	3.7511	Positive	Negative	Positive	Positive
24	1	A3	single	single	S03_81	S03	81	4.33	4.57	NA	4.57	4.33	4.33257	Positive	Negative	Positive	Positive
25	1	A3	single	single	S03_83	S03	83	4.09	4.29	NA	4.29	4.09	4.08838	Positive	Negative	Positive	Positive
26	1	A3	single	single	S03_98	S03	98	4.39	4.69	NA	4.69	4.39	4.38925	Positive	Negative	Positive	Positive
27	1	A3	single	single	S04_108	S04	108	2.85	3.41	NA	3.41	2.85	2.84688	Positive	Negative	Positive	Positive
28	1	A3	single	single	S04_109	S04	109	4.42	4.63	NA	4.63	4.42	4.42322	Positive	Negative	Positive	Positive
29	1	A3	single	single	S04_55	S04	55	NA	NA	NA	NA	NA	NA	Negative	Negative	Negative	Negative
30	1	A3	single	single	S04_68	S04	68	3.58	3.69	NA	3.69	3.58	3.57534	Positive	Negative	Positive	Positive
31	1	A3	single	single	S04_71	S04	71	4.02	4.3	NA	4.3	4.02	4.0164	Positive	Negative	Positive	Positive
32	1	A3	single	single	S04_73	S04	73	NA	NA	NA	NA	NA	NA	Negative	Negative	Negative	Negative
33	1	A3	single	single	S04_81	S04	81	4.1	4.38	NA	4.38	4.1	4.1031	Positive	Negative	Positive	Positive
34	1	A3	single	single	S04_91	S04	91	4.9	5	NA	5	4.9	4.89654	Positive	Negative	Positive	Positive
35	1	A3	single	single	S06_100	S06	100	2.45	3.95	NA	3.95	2.45	2.45339	Positive	Negative	Positive	Positive
36	1	A3	single	single	S06_119	S06	119	3.17	2.35	NA	2.35	3.17	3.1667	Positive	Negative	Positive	Positive
37	1	A3	single	single	S06_53	S06	53	3.78	3.43	NA	3.43	3.78	3.77984	Positive	Negative	Positive	Positive
38	1	A3	single	single	S06_57	S06	57	3.68	4.39	NA	4.39	3.68	3.67762	Positive	Negative	Positive	Positive
39	1	A3	single	single	S06_61	S06	61	2.88	3.23	NA	3.23	2.88	2.876	Positive	Negative	Positive	Positive
40	1	A3	single	single	S06_62	S06	62	3.38	3.59	NA	3.59	3.38	3.38423	Positive	Negative	Positive	Positive
41	1	A3	single	single	S06_94	S06	94	NA	NA	NA	NA	NA	NA	Negative	Negative	Negative	Negative
42	1	A3	single	single	S07_55	S07	55	2.83	3.65	NA	3.65	2.83	2.82547	Positive	Negative	Positive	Positive
43	1	A3	single	single	S07_57	S07	57	3.66	3.83	NA	3.83	3.66	3.66336	Positive	Negative	Positive	Positive
44	1	A3	single	single	S07_58	S07	58	4.78	4.94	NA	4.94	4.78	4.77859	Positive	Negative	Positive	Positive
45	1	A3	single	single	S07_61	S07	61	3.71	3.94	NA	3.94	3.71	3.7087	Positive	Negative	Positive	Positive
46	1	A3	single	single	S07_78	S07	78	3.64	3.82	NA	3.82	3.64	3.63856	Positive	Negative	Positive	Positive
47	1	A3	single	single	S07_79	S07	79	4.86	5.03	NA	5.03	4.86	4.85588	Positive	Negative	Positive	Positive
48	1	A3	single	single	S07_81	S07	81	3.32	3.4	NA	3.4	3.32	3.32028	Positive	Negative	Positive	Positive
49	1	A3	single	single	S07_82	S07	82	3.82	4	NA	4	3.82	3.82477	Positive	Negative	Positive	Positive
50	1	A3	single	single	S08_53	S08	53	4.18	4.35	NA	4.35	4.18	4.18312	Positive	Negative	Positive	Positive
51	1	A3	single	single	S08_54	S08	54	4.56	4.82	NA	4.82	4.56	4.55511	Positive	Negative	Positive	Positive
52	1	A3	single	single	S08_74	S08	74	2.17	2.78	NA	2.78	2.17	2.16741	Positive	Negative	Positive	Positive
53	1	A3	single	single	S08_77	S08	77	4.76	4.79	NA	4.79	4.76	4.75591	Positive	Negative	Positive	Positive
54	1	A3	single	single	S08_84	S08	84	4.66	4.77	NA	4.77	4.66	4.66172	Positive	Negative	Positive	Positive
55	1	A3	single	single	S08_88	S08	88	NA	NA	NA	NA	NA	NA	Negative	Negative	Negative	Negative
56	1	A3	single	single	S08_89	S08	89	4.41	4.46	NA	4.46	4.41	4.41207	Positive	Negative	Positive	Positive
57	1	A3	single	single	S08_91	S08	91	3.45	3.63	NA	3.63	3.45	3.4524	Positive	Negative	Positive	Positive
58	1	A3	single	single	S08_92	S08	92	3.64	3.93	NA	3.93	3.64	3.64222	Positive	Negative	Positive	Positive
59	1	A3	single	single	S09_59	S09	59	3.64	3.98	NA	3.98	3.64	3.6435	Positive	Negative	Positive	Positive
60	1	A3	single	single	S09_65	S09	65	3.66	3.71	NA	3.71	3.66	3.66049	Positive	Negative	Positive	Positive
61	1	A3	single	single	S09_66	S09	66	4.47	4.54	NA	4.54	4.47	4.47092	Positive	Negative	Positive	Positive
62	1	A3	single	single	S09_69	S09	69	4.04	4.17	NA	4.17	4.04	4.039	Positive	Negative	Positive	Positive
63	1	A3	single	single	S09_73	S09	73	3.82	4.21	NA	4.21	3.82	3.82378	Positive	Negative	Positive	Positive
64	1	A3	single	single	S09_94	S09	94	NA	NA	NA	NA	NA	NA	Negative	Negative	Negative	Negative
65	1	A3	single	single	S09_97	S09	97	3.99	4.05	NA	4.05	3.99	3.99026	Positive	Negative	Positive	Positive
66	1	A3	single	single	S10_106	S10	106	NA	NA	NA	NA	NA	NA	Negative	Negative	Negative	Negative
67	1	A3	single	single	S10_64	S10	64	4.27	4.59	NA	4.59	4.27	4.27406	Positive	Negative	Positive	Positive
68	1	A3	single	single	S10_65	S10	65	4.48	4.93	NA	4.93	4.48	4.48409	Positive	Negative	Positive	Positive
69	1	A3	single	single	S10_66	S10	66	3.09	3.29	NA	3.29	3.09	3.09334	Positive	Negative	Positive	Positive
70	1	A3	single	single	S10_67	S10	67	2.94	3.05	NA	3.05	2.94	2.94088	Positive	Negative	Positive	Positive
71	1	A3	single	single	S10_74	S10	74	3.65	3.99	NA	3.99	3.65	3.65029	Positive	Negative	Positive	Positive
72	1	A3	single	single	S10_93	S10	93	3.49	3.83	NA	3.83	3.49	3.49446	Positive	Negative	Positive	Positive
73	1	A3	single	single	S10_96	S10	96	3.83	3.9	NA	3.9	3.83	3.82757	Positive	Negative	Positive	Positive
74	1	A3_A10	double	NA	S11_109	S11	109	2.83	NA	2.46	NA	NA	NA	Positive	Positive	Negative	Negative
75	1	A3_A10	double	NA	S11_110	S11	110	NA	NA	NA	NA	NA	NA	Negative	Negative	Negative	Negative
76	1	A3_A10	double	NA	S11_57	S11	57	NA	NA	NA	NA	NA	NA	Negative	Negative	Negative	Negative
77	1	A3_A10	double	NA	S11_61	S11	61	3.44	NA	3.14	NA	NA	NA	Positive	Positive	Negative	Negative
78	1	A3_A10	double	double	S11_70	S11	70	3.49	2.8	3.31	2.8	2.86	2.33926	Positive	Positive	Positive	Positive
79	1	A3_A10	double	NA	S11_76	S11	76	3.09	NA	2.95	NA	NA	NA	Positive	Positive	Negative	Negative
80	1	A3_A10	double	NA	S11_78	S11	78	2.64	NA	2.39	NA	NA	NA	Positive	Positive	Negative	Negative
81	1	A3_A10	double	NA	S11_83	S11	83	4.1	NA	3.89	NA	NA	NA	Positive	Positive	Negative	Negative
82	1	A3_A10	double	NA	S11_87	S11	87	3.63	NA	3.27	NA	NA	NA	Positive	Positive	Negative	Negative
83	1	A3_A10	double	NA	S11_96	S11	96	3.5	NA	3.27	NA	NA	NA	Positive	Positive	Negative	Negative
84	1	A3_A10	double	single	S13_109	S13	109	4.67	4.67	NA	4.67	4.67	4.67125	Positive	Negative	Positive	Positive
85	1	A3_A10	double	double	S13_116	S13	116	3.83	3.85	3.34	3.85	3.71	3.50464	Positive	Positive	Positive	Positive
86	1	A3_A10	double	double	S13_118	S13	118	4.3	4.13	3.51	4.13	4.21	4.04895	Positive	Positive	Positive	Positive
87	1	A3_A10	double	double	S13_54	S13	54	4.2	4.44	2.12	4.44	4.2	4.18801	Positive	Positive	Positive	Positive
88	1	A3_A10	double	double	S13_67	S13	67	2.77	2.71	1.62	2.71	2.74	2.59354	Positive	Positive	Positive	Positive
89	1	A3_A10	double	double	S13_72	S13	72	4.22	4.16	3.68	4.16	4.09	3.90366	Positive	Positive	Positive	Positive
90	1	A3_A10	double	double	S13_78	S13	78	3.02	3.01	1.74	3.01	3	2.90132	Positive	Positive	Positive	Positive
91	1	A3_A10	double	NA	S13_83	S13	83	4.21	NA	3.85	NA	NA	NA	Positive	Positive	Negative	Negative
92	1	A3_A10	double	double	S13_87	S13	87	3.98	3.27	3.29	3.27	3.66	3.27482	Positive	Positive	Positive	Positive
93	1	A3_A10	double	double	S13_89	S13	89	4.21	4.16	2.74	4.16	4.19	4.145	Positive	Positive	Positive	Positive
94	1	A3_A10	double	NA	S14_54	S14	54	2.41	NA	2.14	NA	NA	NA	Positive	Positive	Negative	Negative
95	1	A3_A10	double	double	S14_68	S14	68	3.7	3.63	3.24	3.63	3.55	3.29306	Positive	Positive	Positive	Positive
96	1	A3_A10	double	NA	S14_69	S14	69	NA	NA	NA	NA	NA	NA	Negative	Negative	Negative	Negative
97	1	A3_A10	double	double	S14_72	S14	72	2.81	2.99	1.99	2.99	2.77	2.62223	Positive	Positive	Positive	Positive
98	1	A3_A10	double	double	S14_73	S14	73	2.96	3.21	1.63	3.21	2.95	2.89543	Positive	Positive	Positive	Positive
99	1	A3_A10	double	NA	S14_75	S14	75	3.34	NA	2.86	NA	NA	NA	Positive	Positive	Negative	Negative
100	1	A3_A10	double	double	S14_76	S14	76	3.74	3.21	3.14	3.21	3.47	3.09566	Positive	Positive	Positive	Positive
101	1	A3_A10	double	double	S14_83	S14	83	4.09	4.29	2.96	4.29	4.07	4.0168	Positive	Positive	Positive	Positive
102	1	A3_A10	double	NA	S14_84	S14	84	NA	NA	NA	NA	NA	NA	Negative	Negative	Negative	Negative
103	1	A3_A10	double	double	S15_101	S15	101	2.72	2.75	2.06	2.75	2.64	2.39141	Positive	Positive	Positive	Positive
104	1	A3_A10	double	NA	S15_103	S15	103	3.93	NA	3.66	NA	NA	NA	Positive	Positive	Negative	Negative
105	1	A3_A10	double	NA	S15_104	S15	104	3.5	NA	3.12	NA	NA	NA	Positive	Positive	Negative	Negative
106	1	A3_A10	double	NA	S15_105	S15	105	4.1	NA	4.01	NA	NA	NA	Positive	Positive	Negative	Negative
107	1	A3_A10	double	NA	S15_120	S15	120	4.31	NA	3.88	NA	NA	NA	Positive	Positive	Negative	Negative
108	1	A3_A10	double	NA	S15_57	S15	57	NA	NA	NA	NA	NA	NA	Negative	Negative	Negative	Negative
109	1	A3_A10	double	double	S15_59	S15	59	3.7	4.11	3.1	4.11	3.66	3.56914	Positive	Positive	Positive	Positive
110	1	A3_A10	double	double	S15_65	S15	65	3.19	3.27	2.34	3.27	3.14	2.99458	Positive	Positive	Positive	Positive
111	1	A3_A10	double	NA	S15_80	S15	80	3.88	NA	3.63	NA	NA	NA	Positive	Positive	Negative	Negative
112	1	A3_A10	double	NA	S15_81	S15	81	3.79	NA	3.28	NA	NA	NA	Positive	Positive	Negative	Negative
113	1	A3_A10	double	single	S16_100	S16	100	4.53	4.68	NA	4.68	4.53	4.53445	Positive	Negative	Positive	Positive
114	1	A3_A10	double	double	S16_103	S16	103	4.27	4.3	2.99	4.3	4.25	4.19677	Positive	Positive	Positive	Positive
115	1	A3_A10	double	NA	S16_111	S16	111	3.47	NA	3.26	NA	NA	NA	Positive	Positive	Negative	Negative
116	1	A3_A10	double	single	S16_116	S16	116	4.36	4.18	NA	4.18	4.36	4.35532	Positive	Negative	Positive	Positive
117	1	A3_A10	double	double	S16_54	S16	54	2.24	2.77	1.78	2.77	2.19	2.03095	Positive	Positive	Positive	Positive
118	1	A3_A10	double	NA	S16_71	S16	71	3.63	NA	3.37	NA	NA	NA	Positive	Positive	Negative	Negative
119	1	A3_A10	double	double	S16_79	S16	79	3.49	3.66	2.06	3.66	3.48	3.44257	Positive	Positive	Positive	Positive
120	1	A3_A10	double	single	S16_86	S16	86	3.96	4.16	NA	4.16	3.96	3.95997	Positive	Negative	Positive	Positive
121	1	A3_A10	double	double	S16_87	S16	87	4.05	4.09	3.19	4.09	4	3.8898	Positive	Positive	Positive	Positive
122	1	A3_A10	double	NA	S16_97	S16	97	2.9	NA	2.56	NA	NA	NA	Positive	Positive	Negative	Negative
133	1	A3_A10	double	single	S18_106	S18	106	4.49	4.42	NA	4.42	4.49	4.49113	Positive	Negative	Positive	Positive
134	1	A3_A10	double	NA	S18_107	S18	107	3.85	NA	3.58	NA	NA	NA	Positive	Positive	Negative	Negative
135	1	A3_A10	double	NA	S18_56	S18	56	3.49	NA	3.37	NA	NA	NA	Positive	Positive	Negative	Negative
136	1	A3_A10	double	NA	S18_62	S18	62	2.98	NA	2.41	NA	NA	NA	Positive	Positive	Negative	Negative
137	1	A3_A10	double	NA	S18_68	S18	68	3.02	NA	2.46	NA	NA	NA	Positive	Positive	Negative	Negative
138	1	A3_A10	double	NA	S18_74	S18	74	3.69	NA	3.53	NA	NA	NA	Positive	Positive	Negative	Negative
139	1	A3_A10	double	double	S18_77	S18	77	3.63	3.42	3.26	3.42	3.4	3.06305	Positive	Positive	Positive	Positive
140	1	A3_A10	double	NA	S18_85	S18	85	3.98	NA	3.57	NA	NA	NA	Positive	Positive	Negative	Negative
141	1	A3_A10	double	NA	S18_90	S18	90	4.16	NA	3.79	NA	NA	NA	Positive	Positive	Negative	Negative
142	1	A3_A10	double	NA	S18_99	S18	99	3.8	NA	3.21	NA	NA	NA	Positive	Positive	Negative	Negative
143	1	A3_A10	double	double	S19_119	S19	119	4.15	4.08	3.63	4.08	4.02	3.81498	Positive	Positive	Positive	Positive
144	1	A3_A10	double	single	S19_53	S19	53	3.06	3.51	NA	3.51	3.06	3.06406	Positive	Negative	Positive	Positive
145	1	A3_A10	double	NA	S19_60	S19	60	NA	NA	NA	NA	NA	NA	Negative	Negative	Negative	Negative
146	1	A3_A10	double	double	S19_70	S19	70	3.99	3.4	3.8	3.4	3.44	3.00821	Positive	Positive	Positive	Positive
147	1	A3_A10	double	double	S19_73	S19	73	3.8	4.1	2.1	4.1	3.79	3.77617	Positive	Positive	Positive	Positive
148	1	A3_A10	double	NA	S19_75	S19	75	NA	NA	NA	NA	NA	NA	Negative	Negative	Negative	Negative
149	1	A3_A10	double	double	S19_77	S19	77	3.46	3.44	2.98	3.44	3.33	3.07748	Positive	Positive	Positive	Positive
150	1	A3_A10	double	double	S19_83	S19	83	3.71	3.92	1.48	3.92	3.71	3.70487	Positive	Positive	Positive	Positive
151	1	A3_A10	double	NA	S19_95	S19	95	3.82	NA	3.51	NA	NA	NA	Positive	Positive	Negative	Negative
152	1	A3_A10	double	double	S19_99	S19	99	4.69	4.67	3.67	4.67	4.65	4.57763	Positive	Positive	Positive	Positive
162	2	A10_A3	double	double	S21_101	S21	101	4.32	4.32	3.83	3.83	3.71	4.01822	Positive	Positive	Positive	Positive
163	2	A10_A3	double	NA	S21_112	S21	112	NA	NA	NA	NA	NA	NA	Negative	Negative	Negative	Negative
164	2	A10_A3	double	single	S21_68	S21	68	3.78	NA	3.64	3.64	3.78	3.77984	Positive	Positive	Negative	Positive
165	2	A10_A3	double	NA	S21_69	S21	69	NA	NA	NA	NA	NA	NA	Negative	Negative	Negative	Negative
166	2	A10_A3	double	double	S21_73	S21	73	2.61	3.04	1.26	1.26	0.81	1.59949	Positive	Positive	Positive	Positive
167	2	A10_A3	double	double	S21_75	S21	75	3.95	3.82	3.32	3.32	3.33	3.67478	Positive	Positive	Positive	Positive
168	2	A10_A3	double	NA	S21_80	S21	80	4	4.01	NA	NA	NA	NA	Positive	Negative	Positive	Negative
169	2	A10_A3	double	single	S21_89	S21	89	3.25	NA	2.88	2.88	3.25	3.24902	Positive	Positive	Negative	Positive
170	2	A10_A3	double	single	S21_99	S21	99	3.43	NA	2.82	2.82	3.43	3.43131	Positive	Positive	Negative	Positive
171	2	A10_A3	double	single	S22_100	S22	100	3.86	NA	3.49	3.49	3.86	3.86006	Positive	Positive	Negative	Positive
172	2	A10_A3	double	double	S22_120	S22	120	4.24	4.21	3.35	3.35	3.33	3.75279	Positive	Positive	Positive	Positive
173	2	A10_A3	double	single	S22_58	S22	58	3.5	NA	3.38	3.38	3.5	3.50429	Positive	Positive	Negative	Positive
174	2	A10_A3	double	double	S22_71	S22	71	3.72	3.85	3.2	3.2	2.98	3.38029	Positive	Positive	Positive	Positive
175	2	A10_A3	double	double	S22_73	S22	73	2.81	3.17	2.57	2.57	2.12	2.54687	Positive	Positive	Positive	Positive
176	2	A10_A3	double	single	S22_88	S22	88	2.23	NA	1.26	1.26	2.23	2.2295	Positive	Positive	Negative	Positive
177	2	A10_A3	double	double	S22_89	S22	89	4.56	4.5	3.38	3.38	3.4	3.85782	Positive	Positive	Positive	Positive
178	2	A10_A3	double	double	S22_95	S22	95	4.84	4.09	2.16	2.16	2.91	3.55984	Positive	Positive	Positive	Positive
179	2	A10_A3	double	double	S22_97	S22	97	4.24	3.79	3.99	3.99	4.03	4.16013	Positive	Positive	Positive	Positive
180	2	A10_A3	double	double	S22_99	S22	99	3.64	3.9	2.31	2.31	2.03	2.66051	Positive	Positive	Positive	Positive
181	2	A10_A3	double	double	S23_116	S23	116	4.31	4.31	3.2	3.2	3.17	3.64536	Positive	Positive	Positive	Positive
182	2	A10_A3	double	double	S23_51	S23	51	2.44	2.54	2.24	2.24	1.96	2.30666	Positive	Positive	Positive	Positive
183	2	A10_A3	double	single	S23_53	S23	53	3.41	NA	3.14	3.14	3.41	3.41352	Positive	Positive	Negative	Positive
184	2	A10_A3	double	double	S23_54	S23	54	3.36	3.82	2.95	2.95	2.44	2.90374	Positive	Positive	Positive	Positive
185	2	A10_A3	double	NA	S23_59	S23	59	NA	NA	NA	NA	NA	NA	Negative	Negative	Negative	Negative
186	2	A10_A3	double	double	S23_60	S23	60	4.06	4.27	3.04	3.04	2.8	3.31025	Positive	Positive	Positive	Positive
187	2	A10_A3	double	double	S23_69	S23	69	4.49	4.38	3.36	3.36	3.43	3.87719	Positive	Positive	Positive	Positive
188	2	A10_A3	double	double	S23_84	S23	84	4.26	4.37	2.87	2.87	2.75	3.29413	Positive	Positive	Positive	Positive
189	2	A10_A3	double	double	S23_95	S23	95	4.42	4.38	3.62	3.62	3.59	3.96696	Positive	Positive	Positive	Positive
190	2	A10_A3	double	NA	S24_103	S24	103	4.04	4.07	NA	NA	NA	NA	Positive	Negative	Positive	Negative
191	2	A10_A3	double	double	S24_51	S24	51	2.79	3.14	2.4	2.4	1.98	2.46757	Positive	Positive	Positive	Positive
192	2	A10_A3	double	single	S24_57	S24	57	3.11	NA	2.87	2.87	3.11	3.10664	Positive	Positive	Negative	Positive
193	2	A10_A3	double	NA	S24_63	S24	63	3.72	3.81	NA	NA	NA	NA	Positive	Negative	Positive	Negative
194	2	A10_A3	double	double	S24_68	S24	68	3.97	4.07	2.56	2.56	2.44	3.02957	Positive	Positive	Positive	Positive
195	2	A10_A3	double	NA	S24_69	S24	69	4.36	4.43	NA	NA	NA	NA	Positive	Negative	Positive	Negative
196	2	A10_A3	double	single	S24_73	S24	73	3.44	NA	3.01	3.01	3.44	3.43857	Positive	Positive	Negative	Positive
197	2	A10_A3	double	double	S24_88	S24	88	4.16	3.88	3.65	3.65	3.72	3.97593	Positive	Positive	Positive	Positive
198	2	A10_A3	double	double	S24_94	S24	94	3.84	3.58	3.24	3.24	3.34	3.64709	Positive	Positive	Positive	Positive
199	2	A10_A3	double	NA	S24_97	S24	97	4.51	4.44	NA	NA	NA	NA	Positive	Negative	Positive	Negative
210	2	A10_A3	double	NA	S26_52	S26	52	3.6	3.97	NA	NA	NA	NA	Positive	Negative	Positive	Negative
211	2	A10_A3	double	double	S26_54	S26	54	2.81	3.18	1.32	1.32	0.94	1.71782	Positive	Positive	Positive	Positive
212	2	A10_A3	double	NA	S26_56	S26	56	4.19	4.37	NA	NA	NA	NA	Positive	Negative	Positive	Negative
213	2	A10_A3	double	NA	S26_57	S26	57	3.67	3.93	NA	NA	NA	NA	Positive	Negative	Positive	Negative
214	2	A10_A3	double	NA	S26_58	S26	58	3.37	3.3	NA	NA	NA	NA	Positive	Negative	Positive	Negative
215	2	A10_A3	double	NA	S26_67	S26	67	3.79	3.9	NA	NA	NA	NA	Positive	Negative	Positive	Negative
216	2	A10_A3	double	NA	S26_68	S26	68	4.52	4.58	NA	NA	NA	NA	Positive	Negative	Positive	Negative
217	2	A10_A3	double	NA	S26_69	S26	69	3.82	4.12	NA	NA	NA	NA	Positive	Negative	Positive	Negative
218	2	A10_A3	double	NA	S26_71	S26	71	4.01	4.37	NA	NA	NA	NA	Positive	Negative	Positive	Negative
219	2	A10_A3	double	NA	S26_77	S26	77	5.2	5.1	NA	NA	NA	NA	Positive	Negative	Positive	Negative
220	2	A10_A3	double	double	S27_51	S27	51	3.34	3.57	2.92	2.92	2.6	3.01719	Positive	Positive	Positive	Positive
221	2	A10_A3	double	single	S27_55	S27	55	3.64	NA	3.61	3.61	3.64	3.63769	Positive	Positive	Negative	Positive
222	2	A10_A3	double	double	S27_56	S27	56	3.32	2.76	2.83	2.83	3.05	3.25117	Positive	Positive	Positive	Positive
223	2	A10_A3	double	double	S27_58	S27	58	3.85	3.92	1.73	1.73	1.66	2.36829	Positive	Positive	Positive	Positive
224	2	A10_A3	double	NA	S27_60	S27	60	4.52	4.43	NA	NA	NA	NA	Positive	Negative	Positive	Negative
225	2	A10_A3	double	NA	S27_61	S27	61	3.44	3.25	NA	NA	NA	NA	Positive	Negative	Positive	Negative
226	2	A10_A3	double	double	S27_63	S27	63	4.92	4.94	2.88	2.88	2.86	3.39293	Positive	Positive	Positive	Positive
227	2	A10_A3	double	NA	S28_52	S28	52	2.18	2.94	NA	NA	NA	NA	Positive	Negative	Positive	Negative
228	2	A10_A3	double	single	S28_56	S28	56	3.46	NA	3.26	3.26	3.46	3.45899	Positive	Positive	Negative	Positive
229	2	A10_A3	double	double	S28_66	S28	66	4.07	3.62	3.24	3.24	3.54	3.85937	Positive	Positive	Positive	Positive
230	2	A10_A3	double	double	S28_75	S28	75	4.11	4.09	3.05	3.05	3.03	3.51611	Positive	Positive	Positive	Positive
231	2	A10_A3	double	double	S28_83	S28	83	4.04	4.04	2.27	2.27	2.27	2.90159	Positive	Positive	Positive	Positive
232	2	A10_A3	double	double	S28_85	S28	85	4.38	4.38	3.23	3.23	3.21	3.67496	Positive	Positive	Positive	Positive
233	2	A10_A3	double	double	S28_88	S28	88	4.25	4.05	4.39	4.39	4.09	4.1848	Positive	Positive	Positive	Positive
234	2	A10_A3	double	NA	S28_89	S28	89	NA	NA	NA	NA	NA	NA	Negative	Negative	Negative	Negative
235	2	A10_A3	double	double	S28_94	S28	94	4.04	3.85	3.2	3.2	3.3	3.69851	Positive	Positive	Positive	Positive
244	2	A10_A3	double	single	S30_103	S30	103	3.73	NA	3.2	3.2	3.73	3.72989	Positive	Positive	Negative	Positive
245	2	A10_A3	double	NA	S30_114	S30	114	NA	NA	NA	NA	NA	NA	Negative	Negative	Negative	Negative
246	2	A10_A3	double	single	S30_57	S30	57	3.26	NA	3.28	3.28	3.26	3.26285	Positive	Positive	Negative	Positive
247	2	A10_A3	double	single	S30_59	S30	59	3.08	NA	2.93	2.93	3.08	3.0782	Positive	Positive	Negative	Positive
248	2	A10_A3	double	single	S30_69	S30	69	4.09	NA	3.73	3.73	4.09	4.09258	Positive	Positive	Negative	Positive
249	2	A10_A3	double	double	S30_74	S30	74	3.7	3.9	2.41	2.41	2.19	2.80025	Positive	Positive	Positive	Positive
250	2	A10_A3	double	single	S30_78	S30	78	2.72	NA	2.49	2.49	2.72	2.72122	Positive	Positive	Negative	Positive
251	2	A10_A3	double	single	S30_83	S30	83	2.78	NA	2.44	2.44	2.78	2.77701	Positive	Positive	Negative	Positive
252	2	A10_A3	double	double	S30_85	S30	85	3.75	3.9	2.29	2.29	2.13	2.76148	Positive	Positive	Positive	Positive
253	2	A10	single	single	S31_112	S31	112	2.49	NA	2.08	2.08	2.49	2.49083	Positive	Positive	Negative	Positive
254	2	A10	single	single	S31_115	S31	115	NA	NA	NA	NA	NA	NA	Negative	Negative	Negative	Negative
255	2	A10	single	single	S31_117	S31	117	4.39	NA	3.91	3.91	4.39	4.38925	Positive	Positive	Negative	Positive
256	2	A10	single	single	S31_67	S31	67	2.92	NA	2.75	2.75	2.92	2.91922	Positive	Positive	Negative	Positive
257	2	A10	single	single	S31_76	S31	76	3.65	NA	3.31	3.31	3.65	3.6467	Positive	Positive	Negative	Positive
258	2	A10	single	single	S31_82	S31	82	4.3	NA	3.97	3.97	4.3	4.30151	Positive	Positive	Negative	Positive
259	2	A10	single	single	S31_83	S31	83	NA	NA	NA	NA	NA	NA	Negative	Negative	Negative	Negative
260	2	A10	single	single	S31_92	S31	92	4.87	NA	3.33	3.33	4.87	4.86804	Positive	Positive	Negative	Positive
261	2	A10	single	single	S32_100	S32	100	NA	NA	NA	NA	NA	NA	Negative	Negative	Negative	Negative
262	2	A10	single	single	S32_113	S32	113	3.94	NA	3.45	3.45	3.94	3.93937	Positive	Positive	Negative	Positive
263	2	A10	single	single	S32_117	S32	117	3.83	NA	3.41	3.41	3.83	3.82617	Positive	Positive	Negative	Positive
264	2	A10	single	single	S32_56	S32	56	NA	NA	NA	NA	NA	NA	Negative	Negative	Negative	Negative
265	2	A10	single	single	S32_60	S32	60	3.59	NA	3.7	3.7	3.59	3.58961	Positive	Positive	Negative	Positive
266	2	A10	single	single	S32_71	S32	71	3.56	NA	3.11	3.11	3.56	3.56188	Positive	Positive	Negative	Positive
267	2	A10	single	single	S32_74	S32	74	4.34	NA	4.04	4.04	4.34	4.33839	Positive	Positive	Negative	Positive
268	2	A10	single	single	S32_91	S32	91	3.93	NA	3.57	3.57	3.93	3.92963	Positive	Positive	Negative	Positive
269	2	A10	single	single	S32_95	S32	95	4.08	NA	3.71	3.71	4.08	4.07663	Positive	Positive	Negative	Positive
270	2	A10	single	single	S32_99	S32	99	4.4	NA	4.17	4.17	4.4	4.40324	Positive	Positive	Negative	Positive
271	2	A10	single	single	S33_115	S33	115	4.73	NA	4.35	4.35	4.73	4.72902	Positive	Positive	Negative	Positive
272	2	A10	single	single	S33_120	S33	120	3.66	NA	3.31	3.31	3.66	3.65635	Positive	Positive	Negative	Positive
273	2	A10	single	single	S33_63	S33	63	4.18	NA	3.93	3.93	4.18	4.17746	Positive	Positive	Negative	Positive
274	2	A10	single	single	S33_69	S33	69	4.06	NA	3.84	3.84	4.06	4.05529	Positive	Positive	Negative	Positive
275	2	A10	single	single	S33_70	S33	70	3.3	NA	2.85	2.85	3.3	3.29939	Positive	Positive	Negative	Positive
276	2	A10	single	single	S33_73	S33	73	3.99	NA	3.69	3.69	3.99	3.9938	Positive	Positive	Negative	Positive
277	2	A10	single	single	S33_76	S33	76	3.72	NA	3.43	3.43	3.72	3.71799	Positive	Positive	Negative	Positive
278	2	A10	single	single	S33_79	S33	79	3.96	NA	3.57	3.57	3.96	3.96193	Positive	Positive	Negative	Positive
279	2	A10	single	single	S33_86	S33	86	4.29	NA	3.98	3.98	4.29	4.29225	Positive	Positive	Negative	Positive
280	2	A10	single	single	S33_88	S33	88	3.73	NA	3.36	3.36	3.73	3.73356	Positive	Positive	Negative	Positive
281	2	A10	single	single	S34_51	S34	51	NA	NA	NA	NA	NA	NA	Negative	Negative	Negative	Negative
282	2	A10	single	single	S34_52	S34	52	3.27	NA	3.03	3.03	3.27	3.27421	Positive	Positive	Negative	Positive
283	2	A10	single	single	S34_59	S34	59	NA	NA	NA	NA	NA	NA	Negative	Negative	Negative	Negative
284	2	A10	single	single	S34_61	S34	61	4.08	NA	3.66	3.66	4.08	4.08134	Positive	Positive	Negative	Positive
285	2	A10	single	single	S34_62	S34	62	3.04	NA	2.72	2.72	3.04	3.04464	Positive	Positive	Negative	Positive
286	2	A10	single	single	S34_63	S34	63	1.97	NA	3.06	3.06	1.97	1.97137	Positive	Positive	Negative	Positive
287	2	A10	single	single	S34_64	S34	64	4.2	NA	3.87	3.87	4.2	4.20385	Positive	Positive	Negative	Positive
288	2	A10	single	single	S34_70	S34	70	3.29	NA	3.12	3.12	3.29	3.29459	Positive	Positive	Negative	Positive
289	2	A10	single	single	S34_71	S34	71	3.96	NA	3.5	3.5	3.96	3.95914	Positive	Positive	Negative	Positive
290	2	A10	single	single	S34_78	S34	78	3.46	NA	3.08	3.08	3.46	3.45834	Positive	Positive	Negative	Positive
291	2	A10	single	single	S35_102	S35	102	3.72	NA	3.48	3.48	3.72	3.71925	Positive	Positive	Negative	Positive
292	2	A10	single	single	S35_110	S35	110	4.18	NA	3.92	3.92	4.18	4.17821	Positive	Positive	Negative	Positive
293	2	A10	single	single	S35_113	S35	113	NA	NA	NA	NA	NA	NA	Negative	Negative	Negative	Negative
294	2	A10	single	single	S35_115	S35	115	NA	NA	NA	NA	NA	NA	Negative	Negative	Negative	Negative
295	2	A10	single	single	S35_54	S35	54	NA	NA	NA	NA	NA	NA	Negative	Negative	Negative	Negative
296	2	A10	single	single	S35_56	S35	56	2.42	NA	2.43	2.43	2.42	2.41642	Positive	Positive	Negative	Positive
297	2	A10	single	single	S35_81	S35	81	2.71	NA	2.46	2.46	2.71	2.70944	Positive	Positive	Negative	Positive
298	2	A10	single	single	S35_90	S35	90	3.78	NA	3.6	3.6	3.78	3.77921	Positive	Positive	Negative	Positive
299	2	A10	single	single	S35_92	S35	92	3.3	NA	2.81	2.81	3.3	3.30043	Positive	Positive	Negative	Positive
300	2	A10	single	single	S35_93	S35	93	NA	NA	NA	NA	NA	NA	Negative	Negative	Negative	Negative
301	2	A10	single	single	S36_51	S36	51	3.86	NA	3.83	3.83	3.86	3.85928	Positive	Positive	Negative	Positive
302	2	A10	single	single	S36_67	S36	67	3.2	NA	3.01	3.01	3.2	3.19751	Positive	Positive	Negative	Positive
303	2	A10	single	single	S36_68	S36	68	3.5	NA	3.08	3.08	3.5	3.50252	Positive	Positive	Negative	Positive
304	2	A10	single	single	S36_71	S36	71	4.49	NA	4.26	4.26	4.49	4.48501	Positive	Positive	Negative	Positive
305	2	A10	single	single	S36_74	S36	74	3.49	NA	1.55	1.55	3.49	3.48563	Positive	Positive	Negative	Positive
306	2	A10	single	single	S36_75	S36	75	2.89	NA	2.6	2.6	2.89	2.88577	Positive	Positive	Negative	Positive
307	2	A10	single	single	S36_78	S36	78	3.54	NA	3.23	3.23	3.54	3.54262	Positive	Positive	Negative	Positive
308	2	A10	single	single	S36_87	S36	87	4.46	NA	4.12	4.12	4.46	4.45768	Positive	Positive	Negative	Positive
309	2	A10	single	single	S36_89	S36	89	3.85	NA	3.53	3.53	3.85	3.84874	Positive	Positive	Negative	Positive
310	2	A10	single	single	S38_102	S38	102	4.06	NA	3.22	3.22	4.06	4.05562	Positive	Positive	Negative	Positive
311	2	A10	single	single	S38_104	S38	104	3.27	NA	3.79	3.79	3.27	3.2718	Positive	Positive	Negative	Positive
312	2	A10	single	single	S38_106	S38	106	NA	NA	NA	NA	NA	NA	Negative	Negative	Negative	Negative
313	2	A10	single	single	S38_117	S38	117	1.61	NA	1.38	1.38	1.61	1.613	Positive	Positive	Negative	Positive
314	2	A10	single	single	S38_54	S38	54	2.19	NA	1.95	1.95	2.19	2.18631	Positive	Positive	Negative	Positive
315	2	A10	single	single	S38_61	S38	61	NA	NA	NA	NA	NA	NA	Negative	Negative	Negative	Negative
316	2	A10	single	single	S38_62	S38	62	NA	NA	NA	NA	NA	NA	Negative	Negative	Negative	Negative
317	2	A10	single	single	S38_64	S38	64	NA	NA	NA	NA	NA	NA	Negative	Negative	Negative	Negative
318	2	A10	single	single	S38_75	S38	75	3.26	NA	2.69	2.69	3.26	3.25628	Positive	Positive	Negative	Positive
319	2	A10	single	single	S38_76	S38	76	2.34	NA	2.67	2.67	2.34	2.33881	Positive	Positive	Negative	Positive
320	2	A10	single	single	S39_105	S39	105	NA	NA	NA	NA	NA	NA	Negative	Negative	Negative	Negative
321	2	A10	single	single	S39_110	S39	110	NA	NA	NA	NA	NA	NA	Negative	Negative	Negative	Negative
322	2	A10	single	single	S39_114	S39	114	3.21	NA	2.76	2.76	3.21	3.20631	Positive	Positive	Negative	Positive
323	2	A10	single	single	S39_116	S39	116	3.24	NA	2.87	2.87	3.24	3.23747	Positive	Positive	Negative	Positive
324	2	A10	single	single	S39_52	S39	52	2.67	NA	2.85	2.85	2.67	2.67205	Positive	Positive	Negative	Positive
325	2	A10	single	single	S39_69	S39	69	3.05	NA	3.18	3.18	3.05	3.04979	Positive	Positive	Negative	Positive
326	2	A10	single	single	S39_71	S39	71	3.21	NA	2.8	2.8	3.21	3.21189	Positive	Positive	Negative	Positive
327	2	A10	single	single	S39_83	S39	83	3.73	NA	3.54	3.54	3.73	3.72849	Positive	Positive	Negative	Positive
328	2	A10	single	single	S39_90	S39	90	3.71	NA	3.44	3.44	3.71	3.70612	Positive	Positive	Negative	Positive
329	2	A10	single	single	S40_106	S40	106	3.55	NA	3.11	3.11	3.55	3.54825	Positive	Positive	Negative	Positive
330	2	A10	single	single	S40_114	S40	114	3.27	NA	3.17	3.17	3.27	3.2718	Positive	Positive	Negative	Positive
331	2	A10	single	single	S40_116	S40	116	3.3	NA	2.97	2.97	3.3	3.30254	Positive	Positive	Negative	Positive
332	2	A10	single	single	S40_117	S40	117	NA	NA	NA	NA	NA	NA	Negative	Negative	Negative	Negative
333	2	A10	single	single	S40_52	S40	52	3.43	NA	3.59	3.59	3.43	3.42746	Positive	Positive	Negative	Positive
334	2	A10	single	single	S40_64	S40	64	2.96	NA	2.94	2.94	2.96	2.96172	Positive	Positive	Negative	Positive
335	2	A10	single	single	S40_86	S40	86	3.41	NA	3.28	3.28	3.41	3.40951	Positive	Positive	Negative	Positive
336	2	A10	single	single	S40_89	S40	89	NA	NA	NA	NA	NA	NA	Negative	Negative	Negative	Negative
337	2	A10	single	single	S40_92	S40	92	NA	NA	NA	NA	NA	NA	Negative	Negative	Negative	Negative
338	2	A10	single	single	S40_99	S40	99	3.39	NA	3.2	3.2	3.39	3.38849	Positive	Positive	Negative	Positive

## Sheet: explanations
experiment: contains 2 levesl. In 1, strain Fin-Jyv-A3 is the focal strain. In 2, strain NE4049 is the focal strain.
strain: contains 4 levels. A3 and A10 represent single infection groups of respectively strain Fin-Jyv-A3 and NE4049. A3_A10 and A10_A3 represent the co-infection groups.
mouse.status: contains the 2 levels of infection of the mice. Single represents mice infected with one strain, double, mice infected with both strains.
tick.status: contains the 2 levels of infection of the ticks. Single represents nymphs infected with one strain, double, nymphs infected with both strains.
Sample.Name
mouse.id: mice identity
tick.id: nymphs identity
log10.spiro_FLAG: total spirochete load calculated by the flagellin qPCR.
log10.spiro_A3: spirochete load of strain Fin-Jyv-A3 calculated by the ospC A3 qPCR.
log10.spiro_A10: spirochete load of strain NE4049 calculated by the ospC A10 qPCR.
log10.meth1_foc: spirochete load of the focal strain calculated by the first method to estimate the strain specific spirochete loads in the nymphs.
log10.meth2_foc: spirochete load of the focal strain calculated by the second method to estimate the strain specific spirochete loads in the nymphs.
log10.meth3_foc: spirochete load of the focal strain calculated by the third method to estimate the strain specific spirochete loads in the nymphs.
call_FLAG: infection status of the nymphs assessed by the flagellin qPCR.
Call_A10: infection status of the nymphs assessed by the ospC A10 qPCR.
Call_A3: infection status of the nymphs assessed by the ospC A3 qPCR.
call_foc: infection status of the focal strain.
